# Supplementary material for: KGSCS—a smart care system for elderly with geriatric chronic diseases: a knowledge graph approach
Source: BMC Med Inform Decis Mak. 2024 Mar 12;24:73. doi: 10.1186/s12911-024-02472-9 (PMC10935789; doi:10.1186/s12911-024-02472-9)
Supplement: Supplementary file 1 — Supplementary Material 1. [file 12911_2024_2472_MOESM1_ESM.xlsx]

## Sheet: Sheet1
	Questionnaire number
	Elderly living and chronic disease status survey table
	project name:
	Data acquisition time:
	Data collection method:
	Name of the data collection personnel:
	Data collection personnel mobile phone:
	Dear interviewees:
	Hello! The research group of Research on the Knowledge Reasoning Model of Intelligent Care for the Elderly sincerely invites you to participate in this research activity. With the gradual acceleration of the aging process of China's population, the average life expectancy continues to extend, and the absolute number of people with chronic diseases is also increasing, which has become an important…
	Basic information of the interviewees
	surname and personal name:
	contact number:
	distinguish:
	street:
	community:
	Part I: Survey of the respondents' current situation
Personal basic information
1	sex:		A.man	B.woman
2	date of birth:
3	age:		A. Under 50	B.50-59 Years old	C.60-69 Years old	D.70-79 Years old	E.80-89 Years old	F.90 And above
4	Household registration:		A.agriculture	B. Non-agricultural
5	Living situation		A. Living with your spouse and your children	B. Live with your children	C. Empty nest (the old couple live together)	D. Living alone (□ attended care □ no care)	E.other:
6	Marriage situation		A.married	B.unmarried	C.bereft of one's spouse	D.dissociaton	E.remarry
7	nation		A.the Han nationality	B. Ethnic groups (______)
8	religion		A. Have (________ religion)	B.not have
9	degree of education		A.an illiterate person	B.primary school	C.junior middle school	D. High school or technical secondary school	E. College, university and above
10	Personal monthly income		A. Less than $1,000 yuan	B.1000-1999 yuan	C.2000-3999 yuan	D.4000-5999 yuan	E.6,000-7,999 yuan	F.8,000-10,000 yuan	G.10000-15000 yuan	H. From 15,000-20,000 yuan	I. RMB 20,000 yuan and above
11	Monthly income source (multiple options)		A.retirement pay	B.basic living allowances	C. Income from labor	D. Subsidies / Allowances	E. No economic source	F. Children to support	G rent income	H. Other please indicate:
12	Economic expenditure situation (monthly calculation, please fill in the approximate amount on the horizontal line)
12.1	Dietary expenditure
12.2	Medical expenses
12.3	Health and health food spending
12.4	Care fee
12.5	Expenditure on nursing supplies
12.6	Expenditure on daily necessities
12.7	transportation fee
12.8	Buy clothes
12.9	Home appliance purchase and equipment maintenance services
12.1	Housing (such as mortgage, rent, housing repair, property costs, etc.)
12.11	Entertainment education and services (including movies, games, books, etc.)
12.12	Other goods and services (such as water, electricity, gas, heating, Internet charges, telephone charges, etc.)
12.13	travel expenses
12.14	investment and finance
12.15	Cost of the world (such as weddings, funerals, subsidies for the next generation, etc.)
12.16	Purchase medical equipment and consumables (such as oxygen generator, blood glucose meter, blood pressure meter, massage therapy meter, salt bag, etc.)
12.17	deductions from income
13	Favferences and hobbies (multiple options)		A.teleview	B.read a book	C.grow flowers	D. Raising pets	E.take a photograph	F.tour	G.see a movie	H.play chess	I.draw	J.smoke	K. Look at the newspaper	L.handwriting	M.take exercise	N.cycle	O.run	P.drink	Q. Watch the short video / live stream of R. Shoot short videos	S.cooking	T.sing	U.dance	V.swim	W.writing	X. No hobby	Y.other ___
14	Ability to use information products (optional)
14.1	Use smartphone capabilities (multiple options)		A. Just answer the phone	B. Wechat and other chat tools	C. Short video software (TikTok, kuaishou, etc.)	D. Taobao and other shopping software	E. Didi and other ride-hailing apps	F. Ticket software	G. Registration software	H.health code	I. Learning power	J. Alipay online banking and other online payment software	K. Play games (such as happy elimination of music, playing chess, playing cards, playing mahjong, etc.)	L.other	_________
14.2	Which smart pension devices are being used (with multiple options)		A.electronic sphygmomanometer	B. Smart mattress	C. Smart watch	D.intelligent closestool	E. Smart home control	F.glucometer	G. One click for help	F. Other __________
15	Family history of chronic illness, history of immediate family members (multiple options)		A.diabetes mellitus	B.hypertension	C.hyperlipemia	D.coronary disease	E.chronic obstructive pulmonary disease	F.agitans paralysis	G.senile dementia	H.glaucoma	I. Cancer, and ______
16	Family history of chronic disease, three generations of collateral relatives (multiple choices)		A.diabetes mellitus	B.hypertension	C.hyperlipemia	D.coronary disease	E.chronic obstructive pulmonary disease	F.agitans paralysis	G.senile dementia	H.glaucoma	I. Cancer, and ______
Spouse (partner) (if not, jump to the next part)
1	Age of the spouse (the partner)		A. Under 50	B.50-59 Years old	C.60-69 Years old	D.70-79 Years old	E.80-89 Years old	F. Admidia 90 years old
2	Marriage of spouse (partner)		A.married	B.unmarried	C.bereft of one's spouse	D.dissociaton	E.remarry
3	Physical ability of a spouse (a partner)		A. In good health	B. Mild disability	C. MD	D. Severe disability
4	Consort (partner) current condition		A.hypertension	B.diabetes mellitus	C.cerebral apoplexy	D.coronary disease	E.chronic obstructive pulmonary disease	F. Others: __________
5	Monthly income of the spouse (a partner)		A. Less than $1,000 yuan	B.1000-1999 yuan	C.2000-3999 yuan	D.4000-5999 yuan	E.6,000-7,999 yuan	F.8,000-10,000 yuan	G.10000-15000 yuan	H. From 15,000-20,000 yuan	I. RMB 20,000 yuan and above
6	Spouse (partner) Monthly income source (multiple options)		A.retirement pay	B.basic living allowances	C. Income from labor	D. Subsidies / Allowances	E. No economic source	F. Children to support	G rent income	H. Other please indicate:
Children (children in this questionnaire include son, daughter-in-law, daughter, son-in-law) and grandchildren
1	Whether it is the lost only child elderly		A.yes	B.deny
2.1	Number of sons:
2.2	Number of daughter-in-law:
2.3	Number of daughters:
2.4	Number of son-in-law:
2.5	Number of grandchildren:
3	Number of children and grandchildren who need care from the elderly:
4.1	Number of children living in the same residence:		Number of grandchildren:	0
4.2	Number of relatively nearby children living in the same city:		Number of grandchildren:	0
4.3	Number of children living far away in the same city:		Number of grandchildren:	0
4.4	Number of children living in other provinces and cities in China:		Number of grandchildren:	2
4.5	Number of children living abroad:		Number of grandchildren:	1
5	How often is it for your children and grandchildren to visit you?		A. Once a day or more	B. Once or more times a week	C. Once or more times a month,	D. Once a few months	E.yearly	F. More than 1 year	G. Never visit
6.1	Number of children in school:		Number of grandchildren:	0
6.2	Number of children without work:		Number of grandchildren:	0
6.3	Number of children at work:		Number of grandchildren:	3
7	Number of younger generations who regularly help you with your daily life:
8	Number of younger generations who can help (assist) you to use intelligent products:
Carever situation
1	Whether the elderly need special care: If you answer "no", please skip questions 2 and 3 below.		A.yes	B.deny
2	Who will take care of it (more optional):		A. Spouse (fellow together)	B.sons and daughters	C.grandchildren	D.nurse	E. Care manager	F. Other relatives	G.friend	F. Others: ________
3	Primary caregivers' information
3.1	sex		A.man	B.woman
3.2	age
3.3	physiclal status		A.good	B.same as	C.range	D. Serious bad
3.4	Relationship with the elderly
3.5	Care years
3.6	Average daily care hours
Social security situation
1	What government guarantees to enjoy		A.basic living allowances	B.give special care to disabled servicemen	C. Disability subsidies	D. Family endowment bed	E. Old age allowance or subsidy	F.not have	G.other
2	Health insurance coverage:		A.yes	B.deny
3	Whether there is any commercial insurance policy:		A.yes	B.deny
4	For free medical care:		A.yes	B.deny
5	Other safeguards:
Physical health status
1	Physical ability		A. In good health	B. Mild disability	C. MD	D. Severe disability	E. Disable but not assessed
2	Current disease condition (more than optional)		A.diabetes mellitus	B.hypertension	C.hyperlipemia	D.coronary disease	E.chronic obstructive pulmonary disease	F.cerebrovascular disease	G.agitans paralysis	H. Cognitive dysfunction	I.glaucoma	J.cancer,	cancer	K. Others: __________
3	Eye condition:		A.glaucoma	B.cataract	C.maculopathy	D.spotted vision	E.presbyopia
4.1	weight:
4.2	stature:
4.3	BMI (automatic calculation)
5	calf girth:
6	Arm around:
7	waistline:
8.1	Whether the sleep is regular		A.have	B.not have
8.2	The average sleep per day for nearly a month
8.3	The number of night
8.4	How much dream		A.yes	B.deny
8.5	Is there a nightmare		A.yes	B.deny
8.6	Whether you feel listless and sleepy and tired during the day		A.yes	B.deny
8.7	Nearly a month, the average nap time every day
9	Mental and psychological conditions		A. Whether there is any anxiety	B. Have depression	C.aggressive behavior	D. Delusional suspicion	E. Other inhibitory behaviors (dull, inactive, quiet, lack of will, fatigue or drowsiness, etc.)
10	What factors have had on your daily psychological or emotional impact?(Can be selected more)		A.information about and appraisal of an epidemic	B.disease	C.family relation	D.interpersonal relation	E.economic issue	F. Elderly love and marriage	G. Housing demolition problem	H. The family and career situation of the children	I.climate	J. The impact of negative information (such as movies, TV series, news reports and novels, etc.)	E. Others: __________
11	Whether you often forget to take your medicine		A.yes	B.between times	C.deny	D. Deprely dependent on caregivers to remind medication
12	Vision situation		A.good	B.same as	C.range	C. Very bad
13	Wear hearing aids:		A.yes	B.deny
14	Hearing situation		A. Talk with people normally without a barrier	B. Need to speak loudly	C. It's almost impossible to hear	D. I can't hear it at all
15	Nearly a month of defecation situation		A. And 4 or more times per day	B. And 1-3 times per day	C.2-3 days	D. Once a day	E. Others: __________
16	Nearly a month whether constipation		A.yes	B.deny
17	Whether the feces is formed in the past month:		A. Yes, round-grained	B. Yes, long strips	C.deny
18	Whether fecal incontinence in the past month:		A.yes	B.deny
19	Fool color in the last month:		A.yellow	B.yellowish-brown	C.bronzing	D.grass green	E.black	F surface or mixed with blood
20	Urinary urination for nearly a month		A.normal	B.frequency of urinatior	C. Oligouria (less than 400ml in 24 hours)	D.incontinentia urinae	E. Others: __________
21	Urine color in the last month:		A.buff	B.yellow	C.deep yellow	D.brown
22	Current pressure sores		A. Multiple pressure sores	B. A pressure ulcer	C. There is a risk of pressure sores	D. No pressure sores
23	Current edema		A. With edema (_________)	B. No edema
24	Current presence of abdominal fluid:		A.yes	B.deny
25	Whether to have a regular physical examination every year		A.yes	B.deny
26	Whether the physical examination promotes the health		A.yes	B.deny
27	After the physical examination, the measures were taken according to whether the results of the physical examination were taken		A.yes	B.deny
28	Whether there has been a fall in the past 1 year		A.yes	B.deny
29	How much impact does the fall on your health?		A.exert a tremendous influence	B. Have a little impact	C.has/have no influence
30	A history
Aging modification and auxiliary equipment adaptation situation
1	Whether the home has carried out a systematic aging modification		A. Yes	B. No
2	There is a desire to carry out aging modification		A. Have a wish	B. No desire
3	Funding sources for aging modification (multiple options)		A.government subsidies	B.at one's own expense	C. Pay by others (payer ______)
4	Auxiliary equipment configuration status:		A.rolling chair	B.crutch	C.walker	D. Mobile toilet	E. Catering AIDS	F.deaf-aid	G.magnifier	H.other
5	Whether the handrails are installed in the home		A.yes	B.deny
6	Whether the home has been eliminated in the height of the difference		A.yes	B.deny
7	Whether there is a toilet installed in the home		A.yes	B.deny
8	The light in the home is sufficient		A.yes	B.deny
9	Whether the floor in the home is anti-skid		A.yes	B.deny
10	Have an emergency call device in the home		A.yes	B.deny
11	Whether there is a nursing bed at home		A.yes	B.deny
12	In the past 1 year, there was no bed fall or fall in the home		A.yes	B.deny
13	Whether you live on floors 2 or above		A.yes	B.deny
14	Whether there is an elevator going up and down the stairs		A.yes	B.deny
15	Whether the community road is level off		A.yes	B.deny
16	Whether the brightness of the community street light is enough		A.yes	B.deny
17	Whether there are public toilets in the community		A.yes	B.deny
Diet
1	Daily meals		A. Two times or less	B. Three times or more
2	Drink milk		A. Never drink	B. Occasionally (drink it every few days)	C. Drink 250ml daily (1 box or 1 cup)	D. Drink 250ml-500ml per day (1-2 boxes or 1-2 cups)	E. Drink more than 500ml per day (2 boxes or more cups).
3	Drink soy milk		A. Never drink	B. Occasionally (drink it every few days)	C. Drink 250ml daily (1 box or 1 cup)	D. Drink 250ml-500ml per day (1-2 boxes or 1-2 cups)	E. Drink more than 500ml per day (2 boxes or more cups).
4	Drink yogurt		A. Never drink	B. Occasionally (drink it every few days)	C. Drink 100ml a day (1 box or 1 small cup)	D. Drink 100ml-200ml per day (1-2 boxes or 1-2 small cups)	E. Drink more than 200ml per day (2 boxes or more than 2 small cups).
5	Drink milk powder		A. Never drink	B. Occasionally (drink it every few days)	C.4 spoons daily (1 cup)	D. Drink more than 4 spoons (more than 1 cup) a day.
6	Eat eggs		A. Never eat	B. Occasionally (eat once every few days)	C. Eat 1-2 meals a day	D. Eat more than 2 meals a day	E. Not quantitative, eat up to ______ a day.
7	Daily drinking water condition (including tea, drinks, etc.)		A. Below 500 ml	B.500-999ml	C.1000-1500ml	D. Above 1,500 ml	E. Almost no water.
8	Drink soup every day		A. Almost no drink	B. One bowl a day;	C. Two bowls a day;	D.3 bowls or more a day;
9	Eat fruit		A. Never eat	B. Eat 0.5 meals a day	C. Eat 1 a day	D. Eat 1 or more _______ meals a day
10.1	Eat meat and fish every day (the normal amount is the size of the "half palm")		A.0.5 Of	B. One	C. Two,	D. Three,	E. More than 3	F. Almost don't eat
10.2	bean products		A.0.5 Of	B. One	C. Two,	D. Three,	E. More than 3	F. Almost don't eat
11	Cooking fresh vegetables for morning, lunch and dinner: (the normal amount of vegetables is about the size of a fist after cutting)
11.1	breakfast		A.0.5 Of	B. One	C. Two	D. Three	E. More than 3	F. Almost don't eat
11.2	midday meal		A.0.5 Of	B. One	C. Two	D. Three	E. More than 3	F. Almost don't eat
11.3	supper		A.0.5 Of	B. One	C. Two	D. Three	E. More than 3	F. Almost don't eat
12	The staple food is about how much for a meal
				Rice (1 bowl of about 150g)	Bread (160g of sliced bread)	Noodle (1 bowl)	Other (such as porridge, steamed bread, etc.)	unit
	breakfast		1. Almost no food	2. Bowl	3, the film	4. Bowl
	Chinese meal		1. Almost no food	2. Bowl	3, the film	4. Bowl
	supper		1. Almost no food	2. Bowl	3, the film	4. Bowl
	extra meal		1. Almost no food	2. Bowl	3, the film	4. Bowl
13	Whether bread and steamed bread with stuffing or with jam, honey, butter (only for bread and steamed bread in the previous question)
13.1	Butter, sesame paste, peanut butter, 28 sauce		A. Do not apply	B.scumbling	C. Thick coating
13.2	Jam, honey, bean paste sauce		A. Do not apply	B.scumbling	C. Thick coating
13.3	With filling		A. Do not apply	B.scumbling	C. Thick coating
14	Daily intake of potato (such as sweet potato, yam, potato, taro, etc.) (common intake is 50g, about the size of an egg)		A. Almost don't eat	B. Eat, but in relatively little quantity	C. Eat, the amount is normal	D. Eat more
15	Cook vegetables and put sugar		A. Never put	B. Less	C. Often put
16	Coffee, tea and other drinking conditions		A. Almost no drink	B. Occasionally drink	C. One cup a day	D. In 1 day, 2 cups and more, a cup
17	Sugar drinks (cola, fruit juice) are consumed every day		A. Almost no drink	B. Occasionally drink	C. One cup a day	D. In 1 day, 2 cups and more, a cup
18	Eat dessert every day		A. Almost don't eat	B. Occasionally eat	C. One or more in a day, each
19	The type and quantity of snacks eaten almost every day (e. g.: 1 pastry, 4 soda cookies)
20	Fried, fried, fried, sesame paste food situation		A. Almost don't eat	B. Occasionally eat	C. Once a day	D.twice or more per day
21	Fish and poultry and animal meat		A. I don't eat much of either kind	B. Eat more fish	C. Eat a lot of poultry	D. Eat a lot of meat	E. Everything eat about the same
22	What kind of fat meat and lean meat do you like to eat		A. I like fat meat	B. I like thin meat	C. Fat and thin eat almost
23	Does it taste heavy?		A. The taste is heavy	B. The taste is normal	C. The taste is light
24	Eat pickles		A. Almost don't eat	B. Occasionally eat	C. Often eat
25	Drinking		A. Almost no drink	B. Occasionally drink	C. Drink it regularly, ___ times / week	D. Drink ___ every day, ___ (two / bottle)
26	Whether the weight loss or increase in the last three months		A. Yes, increased / decreased the _____ kg (K.G.），	B. No, it hasn't changed
27	Often eat alone:		A.yes	B.deny
28	Whether there is a problem of not eating food or tooth discomfort		A.yes	B.deny
29	Whether there is any food that makes you feel more difficult to eat		A.yes	B.deny	C. I would choose not to eat, so no
30	Whether you often cough or have voice changes or chest pain after eating		A.yes	B between times	C.deny
31	Whether there have been unable to swallow smoothly or need many attempts to swallow smoothly		A.yes	B between times	C.deny
32	Use of enteral nutrition (Ann, complete Ann, etc.)		A.eschew	B. Occasionally eat	C. Eat daily, eat spoons
33	Which of the following nutritional supplements do you take:		A.albumen powder	B. Vitamins (such as VB, VC, VD, VE, VAD, carotene, cod liver oil, multivitamin), please fill in the specific category:	C. Minerals (such as calcium, iron, zinc, etc.), please fill in the specific category:	D.fish oil	E. Vitamin and mineral compound (if good)
34	Who cooks for you		A.do-it-yourself	B. Family carers do	C. Buy post or takeout	D.other
The fitness exercise situation
1	Exercise habits:		A. No fixed exercise habits	B. Good exercise habits
2	When do fitness habits start?		A. Since childhood	B. More than 10 years	C.1-10 Years	D. Within 1 year
3	Frequency of weekly movement:		A.0 Times	B.1~2 Times	C.3~5 Times	D.nearly everyday	E. Not fixed, about monthly
4	The duration of each exercise		A. Within 30 minutes	B. Within one hour	C. More than 1 hour, and in hours
5	Type of regular exercise (multiple options)		A. Dance, dance	B.taijiquan	C. Yoga class	D. Short time jogging, walking, brisk walking	E. Dumbell, barbell and other instruments	F. Long-distance running, marathon class G.swim G. Cycling class H. Small ball sport I. Big ball sport J.hill climbing K.other,
6	Usually your physical feelings during physical exercise		A. Breathing and heartbeat do not change much more than when not exercising	B. Breathing, your heart beats faster, and you sweat slightly	C. Fast of breath, heartbeat is significantly faster, sweating more
Social situation
1	Overall social participation:		A. Almost no participation	B. Occasionally attend	C. Often participate in
2	How much time is spent on social interaction each day through offline methods:		A.0 Minutes	B. Within 30 minutes	C. For about 30 – 60 min	D. More than 60 minutes
3	How much time is spent on networking each day online:		A.0 Minutes	B. Within 30 minutes	C. For about 30 – 60 min	D. More than 60 minutes
4.1	How many family members or contacts can you meet or make in a month?		A.not have	B. One person	C. Two people	D.3~4 People	E.5~8 People	F.9 People and above
4.2	How many family members or relatives can you safely talk about your personal affairs?		A.not have	B. One person	C. Two people	D.3~4 People	E.5~8 People	F.9 People and above
4.3	How many family members or relatives can help you when you need it?		A.not have	B. One person	C. Two people	D.3~4 People	E.5~8 People	F.9 People and above
5.1	How many friends can you meet or contact in a month?		A.not have	B. One person	C. Two people	D.3~4 People	E.5~8 People	F.9 People and above
5.2	Can you talk about your personal affairs with your friends?		A.not have	B. One person	C. Two people	D.3~4 People	E.5~8 People	F.9 People and above
5.3	How many friends can help you when you need it?		A.not have	B. One person	C. Two people	D.3~4 People	E.5~8 People	F.9 People and above
	4 Total score
	5 Total score
	option		not have	One person	Two people	3~4 People	5~8 People	9 People and above
	score		0	1	2	3	4	5
The second part: the main drug data collection in the past six months
1. Commonly used drugs to treat hypertension
	thiazine diuretic	□ DCT	loop diuretic	□ furosemide
		□ indapamide		□ Torasemide
		□ Dapanamine sustained-release tablets	potassium-sparing diuretics	□ amiloride
	α receptor blockers	□ doxazosin		□ triamterene
		□ prazosin	Aldosterone receptor antagonists	□ eplerenone
		□ hytrin		□ spirolactone
	α, β A. beta-blockers	□ carvedilol	ACEI	□ benazepril
		□ labetalol		□ captopril
		□ aronixil		□ enalapril
	ARB	□ Losartan		□ fosinopril
		□ Valsartan		□ lisinopril
		□ irbesartan		□ Perindopril
		□ Micardis		□ Hoe 498
		□ candesartan	dihydropyridines CCB	□ nifedipine
		□ olmesartan		□ Nifedipine sustained-release tablets
	Non-dihydropyridine class CCB	□ verapamil		□ Nifedipine controlled-release tablets
		□ Verapamil sustained-release tablets		□ amlodipine
		□ Diltiazem capsules		□ Left-amlodipine
	β receptor blockers	□ atenolol		□ felodipine
		□ bisoprolol		□ Felardipine sustained-release film
		□ metolol tablets		□ lacidipine
		□ Metoprolol sustained-release film		□ nicardipine
		□ inderal		□ benidipine
2. Commonly used drugs for treating diabetes mellitus
	biguanides	□ melbine	sulfonylurea	□ glibenclamide
		□ Metformin sustained-release tablets		□ glipizide
	thiazolidinediones	□ rosiglitazone		□ Glyizide controlled-release tablets
		□ Pioglitazone		□ gliclazide
	The α -glycosidase inhibitor	□ acarbose		□ Gliclazide sustained-release tablets
		□ Voglibose		□ gliquidone
		□ migltol		□ glimepiride
	And DPP-4 inhibitors	□ sigliptin		□ Qusilpill (containing glibenclamide)
		□ shagliptin	Insulin	□ Insulin aspart
		□ Vigliptin		□ Low spermin zinc insulin injection
		□ ligliptin		□ protamine zinc insulin
		□ agliptin		□ insulin detemir
	And SGLT-2 inhibitors	□ daglidian		□ insulin lispro
		□ Englenet		□ insulin glargine
		□ Caglidian		□ premixed insulin
	Non-sulfonylurea	□ Repaglinide		Specific drug, ____________
		□ nateglinide
		□ The miglinet calcium tablets
3. Commonly used drugs for treating coronary heart disease
	Nitrates	□ devil's brew	β receptor blockers	□ Metoprolol succinate
		□ carvasin		□ bisoprolol
		□ isosorbide 5-mononitrate		□ metoprolol
	Non-dihydropyridines	□ Including verapamil		□ carvedilol
		□ Del sulphuric acid	CCB (dihydropyridine class)	□ amlodipine
	other	□ trimetazidine		□ nifedipine
		□ nicorandil		□ felodipine
		□ ivabradine	Antiplatelet drugs	□ aspirin
	Cholesterol-lowering drugs	□ statins		□ clopidogrel
		□ fenofibrate	Cyclooxygenase inhibitors	□ rivaroxaban
		□ yi fold wheat cloth		□ Apaxaban
		□ Protoprotein convertase subtilisin 9 (PCSK 9) inhibitor		□ Aidosaban
4. Commonly used drugs for the treatment of cerebrovascular diseases
	Drugs against platelet aggregation	□ aspirin	Fat adjustment and plaque-stabilizing drugs	□ Atorvastatin calcium tablets
		□ Hydroclopidogrel tablets		□ pivastatin tablets
		□ Clopidogrel bisulfate		□ rosuvastatin
		□ ticagrelo		□ fenofibrate
	Drugs that improve the circulation	□ Ginaton		□ simvastatin tablets
		□ blood plug flux	Cyclooxygenase inhibitors	□ aluminum magnesium pilin
		□ Brain Heart Pass Capsule		□ warfarin
	CD-840	□ ciloprost		□ rivaroxaban
		□ Dipyridamole (panendtin)		□ Apaxaban
	other	□ fat will be no problem		□ Aidosaban
		□ lipidakang		□ dabigatran
5. Commonly used drugs for the treatment of COPD
	Drug therapy for COPD	□ bronchodilators	Short-acting β 2 receptor agonist (SABA)	□ albuterol
		□ Phosphodiesterase-4 inhibitor		□ terbutaline
		□ An expectorant and antioxidants	Long-acting β 2 receptor agonist (LABA)	□ formoterol
				□ Salmeterol
	Short-acting M-receptor blockers	□ ipratropium bromide	Inhalated corticosteroids (ICS)	□ budesonide
	Long-acting M-receptor blocker (LAMA)	□ Tiotropium dry powder inhalant		□ fluticasone propionate
	theophyllinum	□ Theo-Dur	ICS/LABA	□ Budesonide / Formoterol
	antioxidant	Of □ N-acetylcysteine		□ Fluticasone / salmeterol
6, other
	sedative hypnotic drugs	□ luminal	Treatment of constipation drugs	□ lactulose
		□ zopiclone		□ polyethylene glycol
		□ Zolpidem		□ magnesium sulfate
				□ phenolphthalein tablets
		□ chloral hydrate		□ glycerol
		□ diazepam		□ Mosapride
		□ lorazepam		□ lichens sporulation
		□ clonazepam		□ Bifidobacteria triad
		□ estazolam		□ Bifidobacterium tetrad
		□ alprazolam		□ B. subtilis diplex
